# Supplementary material for: Highly selective organic transistor biosensor with inkjet printed graphene oxide support system
Source: Royal Society of Chemistry journal article supplement (doi:10.1039/c6tb03357a), 2017-01-01

## Electronic Supplementary Information

### Highly selective organic transistor biosensor with inkjet printed graphene oxide support system

Dong-Hoon Lee<sup>1,†</sup>, Hee-Sang Cho<sup>2</sup>, Dawoon Han<sup>1</sup>, Rohit Chand<sup>1</sup>, Tae-Jong Yoon<sup>2,\*</sup> and  
Yong-Sang Kim<sup>1,\*</sup>

<sup>1</sup>School of Electronic and Electrical Engineering, Sungkyunkwan University, Suwon,  
Gyeonggi, 16419, South Korea

<sup>2</sup>Nano-bio materials chemistry lab, College of Pharmacy, Ajou University, Suwon, Gyeonggi,  
16499, South Korea

\*E-mail: yongsang@skku.edu and tjyoon@ajou.ac.kr

**Fig. S1.** (A) The detailed CAD design of FET. (B) The detailed comparison of all the GOSS printing techniques. (C) The morphology of the GOSS can be controlled by altering the printing condition. (D) SEM image of GOSS on pentacene surface

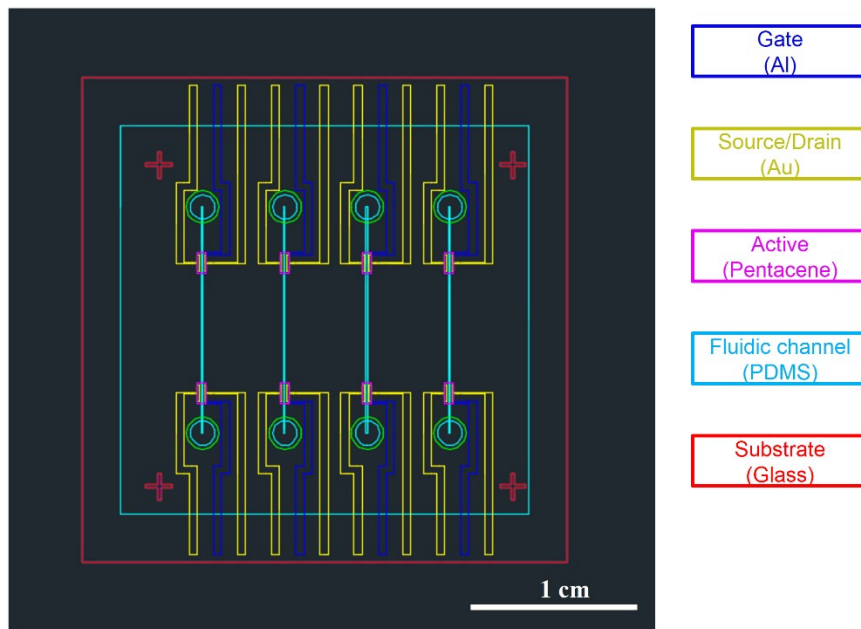

(A)

|         | Drop casting | Fluidic           | Spray             | Inkjet printing                 |
|---------|--------------|-------------------|-------------------|---------------------------------|
| Image   |              |                   |                   |                                 |
| Problem | S-D Short    | Random deposition | Random deposition | Uniform Controllable deposition |

(B)

| Substrate Temperature     | 25 °C                                                                             |                                                                                   |                                                                                   | 80 °C                                                                             |                                                                                    |                                                                                     |
|---------------------------|-----------------------------------------------------------------------------------|-----------------------------------------------------------------------------------|-----------------------------------------------------------------------------------|-----------------------------------------------------------------------------------|------------------------------------------------------------------------------------|-------------------------------------------------------------------------------------|
|                           | Spacing size                                                                      | 60 um                                                                             | 10 um                                                                             | 5 um                                                                              | 60 um                                                                              | 10 um                                                                               |
| Printed GOSS image & size |  |  |  |  |  |  |

(C)

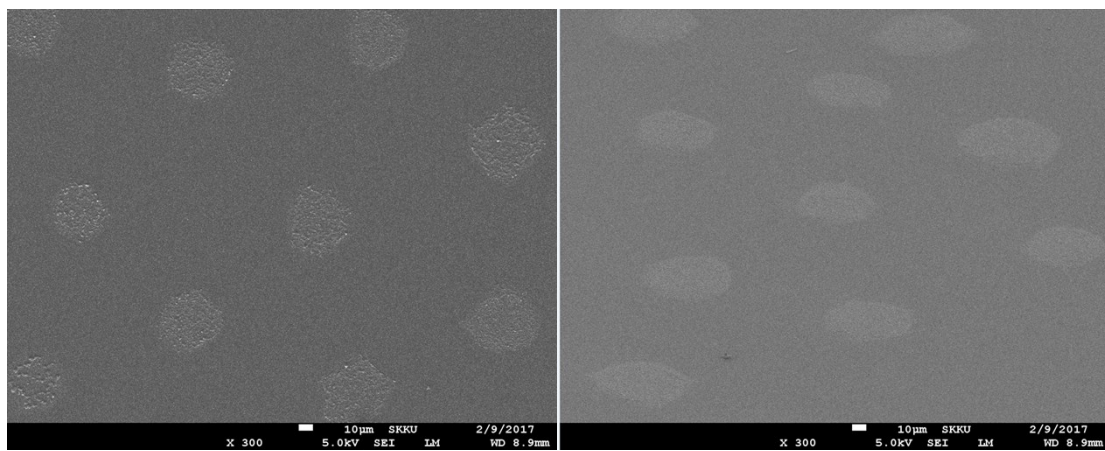

(D)

**Fig. S2.** The various GOs in solution was characterized the charge changing by zeta potential analysis and the aminated ( $\text{-NH}_2$ ) GO was revealed less negative charge property relatively.

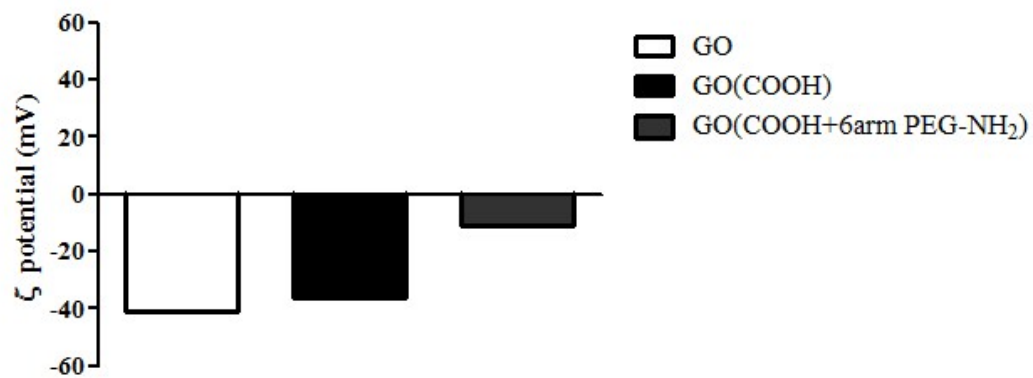

**Fig. S3.** Characterization of HER2 receptor expression level of SkBr3 and MCF-7.

The expression level of HER2 on SkBr3 and MCF-7 cell lines were determined by western blot analysis; and SkBr3 cells showed 14 times higher intensity than MCF-7 cell.

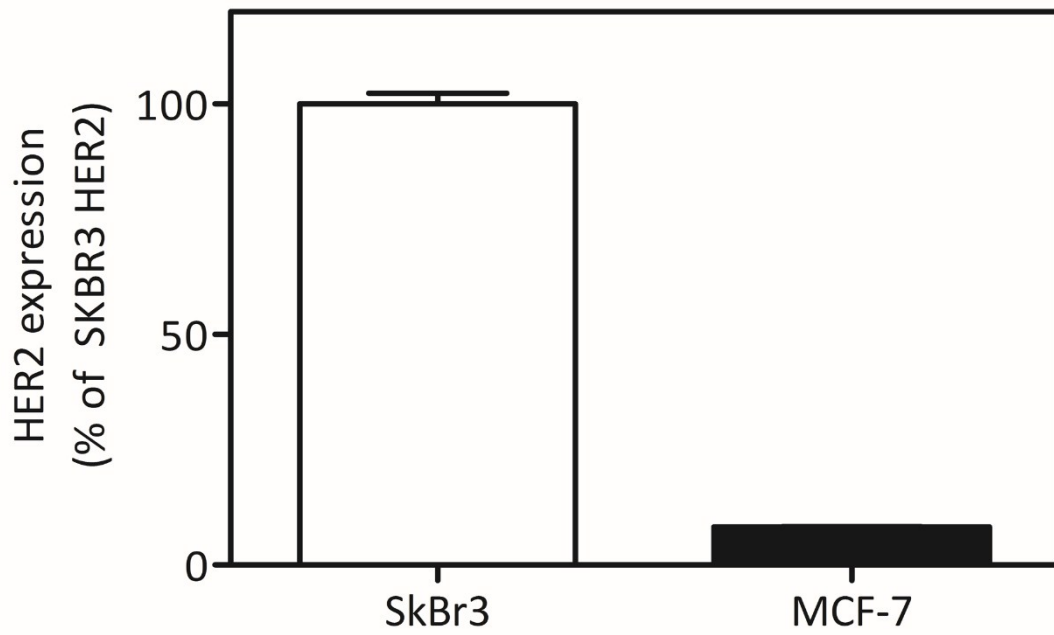

**Fig. S4.** AFM image (A) of GO nano sheet and depth profile graph (B). 1 ~ 4 in the (A) are indicated profile lines for black, red, green and blue in the (B) panel, respectively.

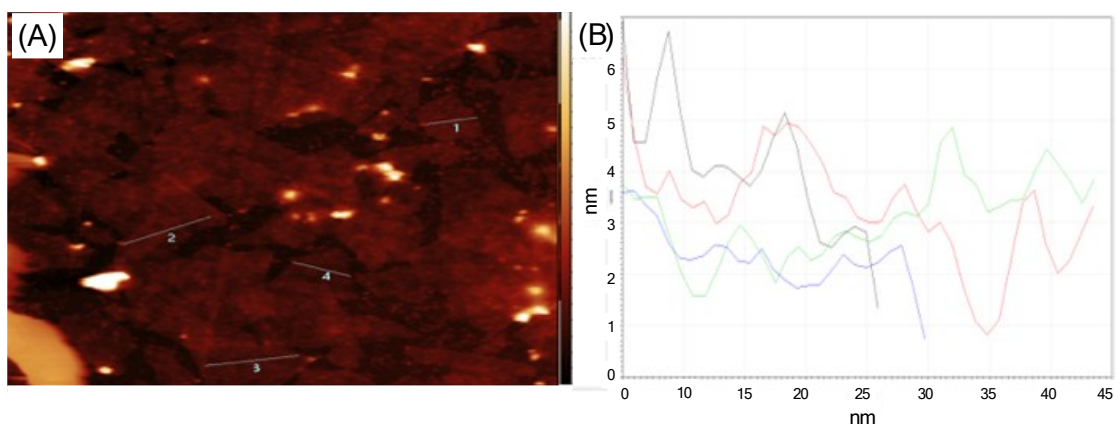

Supplement: c6tb03357a1.pdf [file c6tb03357a1.pdf]
